# Supplementary material for: High-Throughput Yeast Aging Analysis for Cryptococcus (HYAAC) microfluidic device streamlines aging studies in Cryptococcus neoformans
Source: PubMed Central journal article supplement (PMC6620289; doi:10.1038/s42003-019-0504-5), 2019-07-10
Supplement: 42003_2019_504_MOESM1_ESM.pdf [file 42003_2019_504_MOESM1_ESM.pdf]

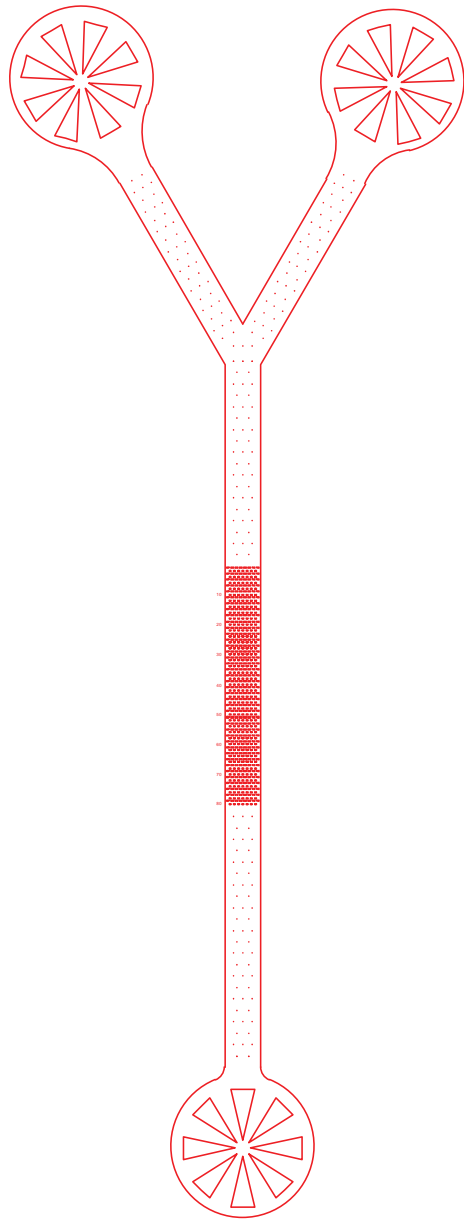

$W = 9 \text{ um}$

**Supplementary Figure 1:** Template outline of one HYAAC channel as designed in AutoCAD.

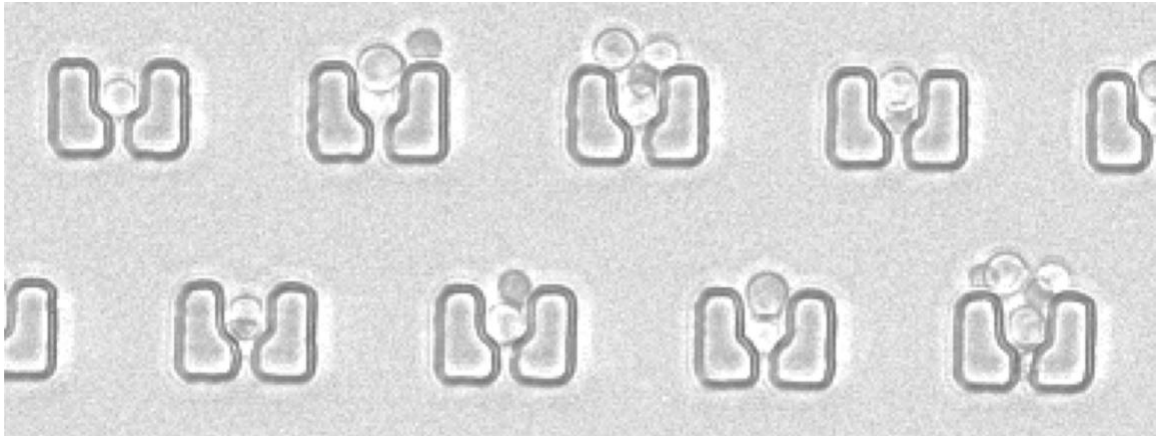

**Supplementary Figure 2:** Original buckets of HYAA chip filled with *C. neoformans*. Numerous issues were found with the original buckets where cells could outgrow through the top or clump and cluster together.

## Retention rate in HYAAC

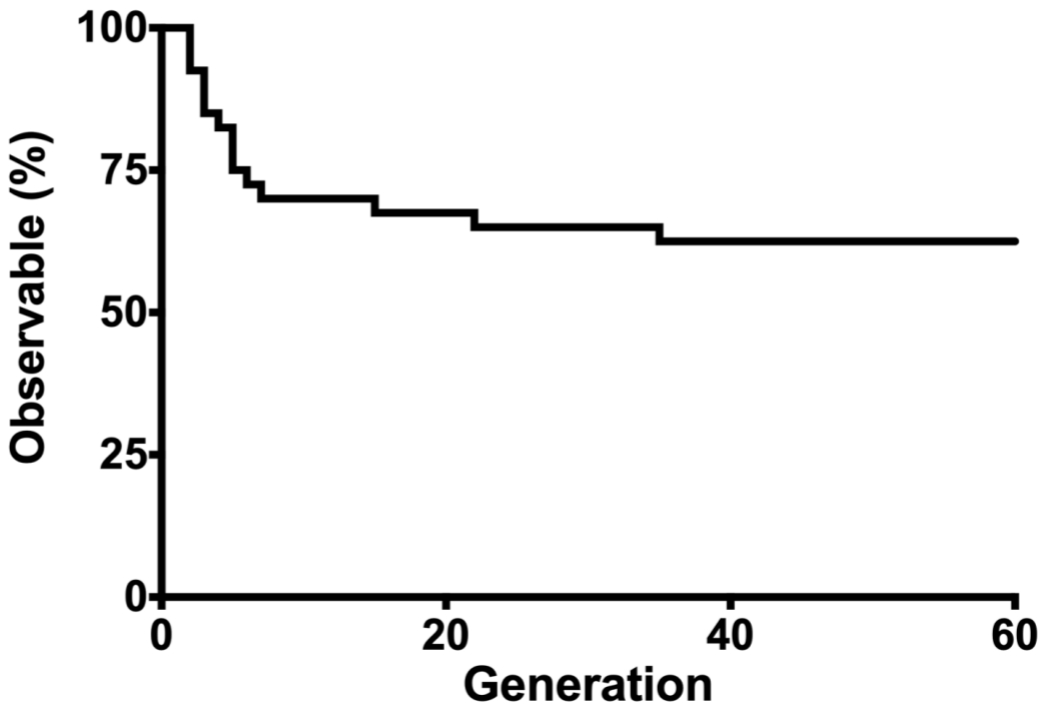

**Supplementary Figure 3:** Retention rate for cells that landed in a trap and replicated at least once. 28% of cells were lost within the first 7 generations and there was an overall retention rate of 62% for the 50 wildtype cells assessed.

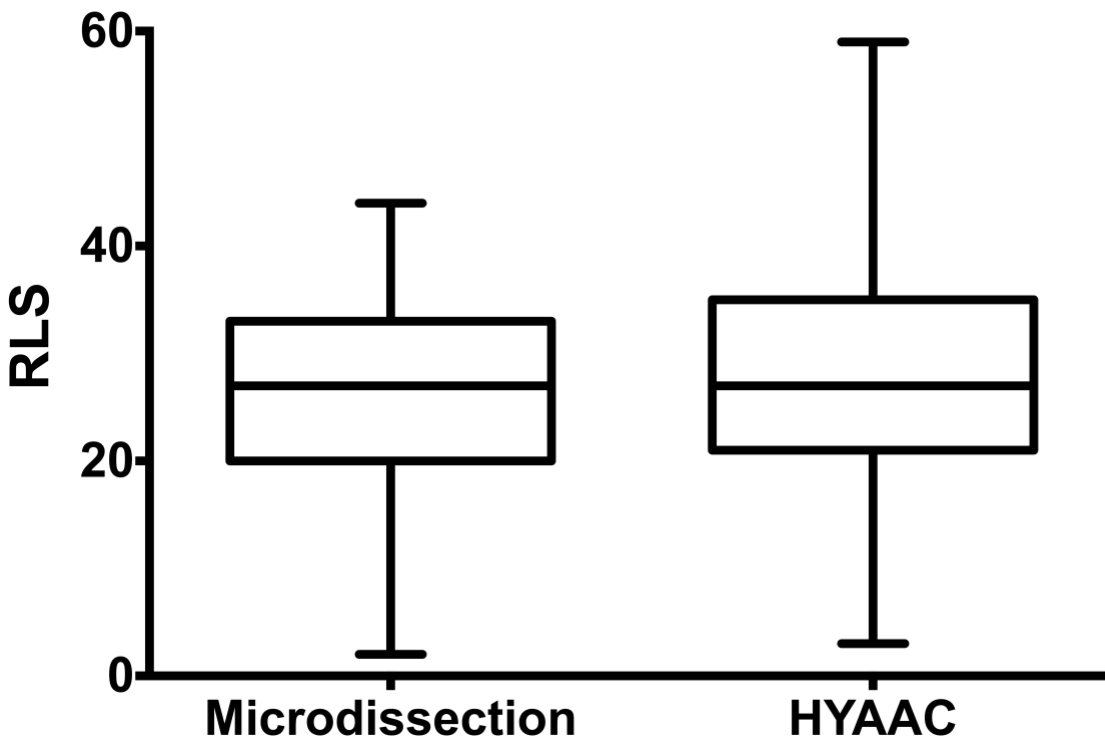

**Supplementary Figure 4:** RLS of WT cells as measured by microdissection ( $n = 30$ ) of in the HYAAC device ( $n = 100$ ).  $P = 0.450$  by Wilcoxon rank sum test. Center line is median, box limits are upper and lower quartiles, whiskers are minimum and maximum.

**Supplementary Table 1:** All strains used in this paper.

| Strain                                                                                                      | Reference                                                                                                                                                                |
|-------------------------------------------------------------------------------------------------------------|--------------------------------------------------------------------------------------------------------------------------------------------------------------------------|
| WT                                                                                                          | H99 - Provided as a gift from Dr. John Perfect of Duke University.                                                                                                       |
| RC2-ALL2:mCherry                                                                                            | Jain et. al, <i>Infection and Immunity</i> (2016)                                                                                                                        |
| H99 $\Delta$ CNAG_05431                                                                                     | Provided as a gift from Dr. Andrew Alspaugh of Duke University.                                                                                                          |
| H99 $\Delta$ CNAG_03465                                                                                     | Provided as a gift from Dr. Peter Williamson of the National Institute for Health.                                                                                       |
| KN99 $\alpha$ $\Delta$ CNAG_00003<br>KN99 $\alpha$ $\Delta$ CNAG_04956<br>KN99 $\alpha$ $\Delta$ CNAG_00028 | Purchased from the Madhani knockout collection managed by the Fungal Genetics Stock Center.                                                                              |
| KN99 $\alpha$ $\Delta$ CNAG_04546<br>KN99 $\alpha$ $\Delta$ CNAG_04313<br>KN99 $\alpha$ $\Delta$ CNAG_06909 | Provided as a gift from Dr. Maurizio Del Poeta at Stony Brook University who purchased from the Madhani knockout collection managed by the Fungal Genetics Stock Center. |

**Supplementary Table 2:** Media used in this paper. Each recipe is adjusted for 1L of media in dH<sub>2</sub>O.

| Media                         | Recipe (in 1L dH <sub>2</sub> O)                                                                                                                              |
|-------------------------------|---------------------------------------------------------------------------------------------------------------------------------------------------------------|
| YPD broth                     | 10 g yeast extract, 20 g peptone, 20 g dextrose (Difco)                                                                                                       |
| YPD agar                      | 10 g yeast extract, 20 g peptone, 20 g dextrose, 15 g agar (Difco)                                                                                            |
| Sabourad Dextrose (SAB) broth | 5 g peptic digest of animal tissue, 5 g pancreatic digest of casein, 20 g dextrose (Difco)                                                                    |
| RPMI 1640                     | 10.4 g RPMI 1640 (with L-glutamine, without sodium bicarbonate), 165 ml 1M MOPS, adjusted to pH 7                                                             |
| SCA media                     | 1.7 g yeast nitrogen base without amino acids, 1 g drop out mix, 0.4% ethanol, 5 g (NH <sub>4</sub> ) <sub>2</sub> SO <sub>4</sub> , 3.3 g NaCl, 20 g glucose |
| SCA - 0.05%                   | 1.7 g yeast nitrogen base without amino acids, 2 g drop out mix, 0.4% ethanol, 5 g (NH <sub>4</sub> ) <sub>2</sub> SO <sub>4</sub> , 3.3 g NaCl, 0.5g glucose |

**Supplementary Table 3:** Primers used in this paper.

| <b>Gene Name</b>  | <b>Forward</b>       | <b>Reverse</b>       |
|-------------------|----------------------|----------------------|
| <i>CNAG_04956</i> | ACGGTATCGTCTCCACCAAC | CCAAAGCCTCGGTAGGTACA |
| <i>CNAG_00028</i> | AACAATGCGGGAAGTGAATC | TTCCGCCTTATCCCTTTTCT |
| <i>CNAG_03465</i> | TTTGGGGCCCCTTAATTATC | GGATAGGTGCATGAGGAGGA |
| <i>CNAG_04313</i> | GGAGCGATTCATTGGTCATT | GTCGGTACGATCGTTGGAGT |
| <i>CNAG_06909</i> | GCCCATAGCACTAGGAGTCG | ATGTCATCCTGCGAATAGCC |
| <i>CNAG_00003</i> | GTGAAACTCGGAGCTTGGTC | TACAATGGGCTCCATGAACA |
| <i>CNAG_04546</i> | TTATCGCATGTCTCCCCTTC | GTGGAATAGGAATGGCATGG |
| <i>ACT1</i>       | CCCACACTGTCCCCATTTAC | AACCACGCTCCATGAGAATC |
